# Supplementary material for: Combinations of slow translating codon clusters can increase mRNA half-life
Source: bioRxiv or medRxiv preprint supplement (doi:10.1101/490995), 2018-12-08
Supplement: Supplementary file [file media-2.pdf]

>double\_cluster\_1\_3\_YDR158W (used to calculate  $\tau_2$ )  
ATGGCTGGAAAGAAAATTGCTGGTGTGTTTGGGTGCTACTGGGTCCGTAGGGCAGAGGTTT  
ATACTGTTGTTGGCAAATCACCTCATTTTGAAGTTCTTGGTGCCTCTTCTAGA  
TCAGCTGGCAAGAAATACGTTGACGCTGTGAACTGGAAGCAAACCGATTTGCTACCGGAA  
TCTGCTACCGATATTATTGTTTCCGAATGTAAATCTGAATTCTTTAAAGAGTGTGACATC  
GTCTTTCCGGATTGGATGCTGACTATGCTGGCGCTATCGAAAAGGAATTCATGGAAGCT  
GGTATCGCCATTGTTTCCAATGCCAAGAATTATAGAAGAGAACAAGATGTGCCATTGATT  
GTTCTGTTGTCAATCCTGAGCATTGGATATTGTAGCTCAAAGCTTGACACCGCCAAG  
GCTCAAGGTAAGCCAAGACCAGGGTTCATTATCTGTATTTCCAATTGTTCCACTGCAGGT  
TTGGTTGCACCATTGAAGCCTTTGATTGAAAAATTCGGTCTATTGATGCTTTGACCACT  
ACTACTTTGCAAGCAATCTCAGGTGCTGGTTTCTCCCCAGGTGTACCAGGTATTGATATT  
CTAGACAATATTATTCCATACATTGGTGGTGAAGAAGACAAGATGGAATGGGAGACCAAG  
AAAATCTTGGCTCCATTAGCAGAAGACAAGACACACGTCAAATATTGACTCCAGAAGAA  
ATCAAAGTCTCTGCTCAATGTAACAGAGTCGCTGTTTCCGATGGGCACACCGAATGTATC  
TCTTTGAGGTTCAAGAACAGACCTGCTCCATCCGTCGAGCAAGTCAAGACATGCCTAAAA  
GAATACGTCTGCGATGCCTACAAATTAGGCTGTCTATTCTGCTCAAAGCAAATATTGAT  
GTTTTGGAACAACCAGACAGACCTCAACCAAGGTTGGACAGGAACAGAGACAGCGGTTAC  
GGTGTTCGTTGGTAGAATCAGAGAAGACCCATTGTTAGATTTCAAATGGTTGCCTT  
TCCCACAACACCATTATTGGTGCCGCTGGGTCCGGGGTACTTATAGCAGAGATCTTACTA  
GCAAGAACTTGATTTAA

>double\_cluster2\_3\_YDR158W (used to calculate  $\tau_{2,ik}$ )  
ATGGCTGGAAAGAAAATTGCTGGTGTGTTTGGGTGCTACTGGTCCGTGGTCAACGTTT  
ATTCTGTTGTTGGCAAATCACCTCATTTTGAAGTTCTTGGTGCCTCTTCTAGA  
TCAGCTGGCAAGAAATACGTTGACGCTGTGAACTGGAAGCAAACCGATTTGCTACCGGAA  
TCTGCTACCGATATTATTGTTTCCGAATGTAAATCTGAATTCTTTAAAGAGTGTGACATC  
GTCTTTCCGGATTGGATGCTGACTATGCTGGCGCTATCGAAAAGGAATTCATGGAAGCT  
GGTATCGCCATTGTTTCCAATGCCAAGAATTATAGAAGAGAACAAGATGTGCCATTGATT  
GTTCTGTTGTCAATCCTGAGCATTGGATATTGTAGCTCAAAGCTTGACACCGCCAAG  
GCTCAAGGTAAGCCAAGACCAGGGTTCATTATCTGTATTTCCAATTGTTCCACTGCAGGT  
TTGGTTGCACCATTGAAGCCTTTGATTGAAAAATTCGGTCTATTGATGCTTTGACCACT  
ACTACTTTGCAAGCAATCTCAGGTGCTGGTTTCTCCCCAGGTGTACCAGGTATTGATATT  
CTAGACAATATTATTCCATACATTGGTGGTGAAGAAGACAAGATGGAATGGGAGACCAAG  
AAAATCTTGGCTCCATTAGCAGAAGACAAGACACACGTCAAATATTGACTCCAGAAGAA  
ATCAAAGTCTCTGCTCAATGTAACAGAGTCGCTGTTTCCGATGGGCACACCGAATGTATC  
TCTTTGAGGTTCAAGAACAGACCTGCTCCATCCGTCGAGCAAGTCAAGACATGCCTAAAA  
GAATACGTCTGCGATGCCTACAAATTAGGCTGTCTATTCTGCTCAAAGCAAATATTGAT  
GTTTTGGAACAACCAGACAGACCTCAACCAAGGTTGGACAGGAACAGAGACAGCGGTTAC  
GGTGTTCGTTGGTAGGATAAGGGAGGATCCCCTTCTGATTTCAAATGGTTGCCTT  
TCCCACAACACCATTATTGGTGCCGCTGGGTCCGGGGTACTTATAGCAGAGATCTTACTA  
GCAAGAACTTGATTTAA

>wildtype\_YDR158W (used to calculate  $\tau_0$ )

```
ATGGCTGGAAAGAAAATTGCTGGTGTGTTGGGTGCTACTGGTCCGTTGGTCAACGTTTC
ATTCTGTTGTTGGCAAATCACCTCATTTGAACTGAAAGTTCTTGGTGCCTCTTCTAGA
TCAGCTGGCAAGAAATACGTTGACGCTGTGAACTGGAAGCAAACCGATTTGCTACCGGAA
TCTGCTACCGATATTATTGTTTCCGAATGTAAATCTGAATTCTTTAAAGAGTGTGACATC
GTCTTTCCGGATTGGATGCTGACTATGCTGGCGCTATCGAAAAGGAATTCATGGAAGCT
GGTATCGCCATTGTTTCCAATGCCAAGAATTATAGAAGAGAACAAGATGTGCCATTGATT
GTTCTGTTGTCAATCCTGAGCATTGGATATTGTAGCTCAAAGCTTGACACCGCCAAG
GCTCAAGGTAAGCCAAGACCAGGGTTCATTATCTGTATTTCCAATTGTTCCACTGCAGGT
TTGGTTGCACCATTGAAGCCTTTGATTGAAAAATTCGGTCCTATTGATGCTTTGACCACT
ACTACTTTGCAAGCAATCTCAGGTGCTGGTTTCTCCCCAGGTGTACCAGGTATTGATATT
CTAGACAATATTATTCCATACATTGGTGGTGAAGAAGACAAGATGGAATGGGAGACCAAG
AAAATCTTGGCTCCATTAGCAGAAGACAAGACACACGTCAAATATTGACTCCAGAAGAA
ATCAAAGTCTCTGCTCAATGTAACAGAGTCGCTGTTTCCGATGGGCACACCGAATGTATC
TCTTTGAGGTTCAAGAACAGACCTGCTCCATCCGTCGAGCAAGTCAAGACATGCCTAAAA
GAATACGTCTGCGATGCCTACAAATTAGGCTGTCATTCTGCTCAAAGCAAATATTGAT
GTTTTGGAACAACCAGACAGACCTCAACCAAGGTTGGACAGGAACAGAGACAGCGGTTAC
GGTGTTCGTTGGTAGAATCAGAGAAGACCCATTGTTAGATTTCAAATGGTTGCCTT
TCCCACAACACCATTATTGGTGCCGCTGGTCTGGTGTCTTGATTGCCGAAATCTTACTA
GCAAGAACTTGATTTAA
```

>single\_cluster2\_YDR158W (used to calculate  $\tau_{1,i}$ )

```
ATGGCTGGAAAGAAAATTGCTGGTGTGTTGGGTGCTACTGGTCCGTTGGTCAACGTTTC
ATTCTGTTGTTGGCAAATCACCTCATTTGAACTGAAAGTTCTTGGTGCCTCTTCTAGA
TCAGCTGGCAAGAAATACGTTGACGCTGTGAACTGGAAGCAAACCGATTTGCTACCGGAA
TCTGCTACCGATATTATTGTTTCCGAATGTAAATCTGAATTCTTTAAAGAGTGTGACATC
GTCTTTCCGGATTGGATGCTGACTATGCTGGCGCTATCGAAAAGGAATTCATGGAAGCT
GGTATCGCCATTGTTTCCAATGCCAAGAATTATAGAAGAGAACAAGATGTGCCATTGATT
GTTCTGTTGTCAATCCTGAGCATTGGATATTGTAGCTCAAAGCTTGACACCGCCAAG
GCTCAAGGTAAGCCAAGACCAGGGTTCATTATCTGTATTTCCAATTGTTCCACTGCAGGT
TTGGTTGCACCATTGAAGCCTTTGATTGAAAAATTCGGTCCTATTGATGCTTTGACCACT
ACTACTTTGCAAGCAATCTCAGGTGCTGGTTTCTCCCCAGGTGTACCAGGTATTGATATT
CTAGACAATATTATTCCATACATTGGTGGTGAAGAAGACAAGATGGAATGGGAGACCAAG
AAAATCTTGGCTCCATTAGCAGAAGACAAGACACACGTCAAATATTGACTCCAGAAGAA
ATCAAAGTCTCTGCTCAATGTAACAGAGTCGCTGTTTCCGATGGGCACACCGAATGTATC
TCTTTGAGGTTCAAGAACAGACCTGCTCCATCCGTCGAGCAAGTCAAGACATGCCTAAAA
GAATACGTCTGCGATGCCTACAAATTAGGCTGTCATTCTGCTCAAAGCAAATATTGAT
GTTTTGGAACAACCAGACAGACCTCAACCAAGGTTGGACAGGAACAGAGACAGCGGTTAC
GGTGTTCGTTGGTAGGATAAGGGAGGATCCCCTTCTTGATTTCAAATGGTTGCCTT
TCCCACAACACCATTATTGGTGCCGCTGGTCTGGTGTCTTGATTGCCGAAATCTTACTA
GCAAGAACTTGATTTAA
```

>single\_cluster3\_YDR158W (used to calculate  $\tau_1$ )

```
ATGGCTGGAAAGAAAATTGCTGGTGTGTTTGGGTGCTACTGGTTCCGTTGGTCAACGTTTC
ATTCTGTTGTTGGCAAATCACCTCATTTGAACTGAAAGTTCTTGGTGCCTCTTCTAGA
TCAGCTGGCAAGAAATACGTTGACGCTGTGAACTGGAAGCAAACCGATTTGCTACCGGAA
TCTGCTACCGATATTATTGTTTCCGAATGTAATCTGAATTCTTTAAAGAGTGTGACATC
GTCTTTCCGGATTGGATGCTGACTATGCTGGCGCTATCGAAAAGGAATTCATGGAAGCT
GGTATCGCCATTGTTTCCAATGCCAAGAATTATAGAAGAGAACAAGATGTGCCATTGATT
GTTCTGTTGTCAATCCTGAGCATTGGATATTGTAGCTCAAAGCTTGACACCGCCAAG
GCTCAAGGTAAGCCAAGACCAGGGTTCATTATCTGTATTTCCAATTGTTCCACTGCAGGT
TTGGTTGCACCATTGAAGCCTTTGATTGAAAAATTCGGTCCTATTGATGCTTTGACCACT
ACTACTTTGCAAGCAATCTCAGGTGCTGGTTTCTCCCCAGGTGTACCAGGTATTGATATT
CTAGACAATATTATTCCATACATTGGTGGTGAAGAAGACAAGATGGAATGGGAGACCAAG
AAAATCTTGGCTCCATTAGCAGAAGACAAGACACACGTCAAACTATTGACTCCAGAAGAA
ATCAAAGTCTCTGCTCAATGTAACAGAGTCGCTGTTTCCGATGGGCACACCGAATGTATC
TCTTTGAGTTCAAGAACAGACCTGCTCCATCCGTCGAGCAAGTCAAGACATGCCTAAAA
GAATACGTCTGCGATGCCTACAAATTAGGCTGTCATTCTGCTCCAAAGCAAATTCAT
GTTTTGGAACAACCAGACAGACCTCAACCAAGTTGGACAGGAACAGAGACAGCGGTTAC
GGTGGTTCCGTTGGTAGAATCAGAGAAGACCATTGTTAGATTTCAAATGGTTGCCTT
TCCCACAACACCATTATTGGTGCCGCTGGGTCGGGGTACTTATAGCAGAGATCTTACTA
GCAAGAACTTGATTTAA
```

>double\_cluster1\_3\_YLR109W (used to calculate  $\tau_2$ )

```
ATGTCTGACTTAGTTAACAAGAAATTCCCAGCTGGCGACTACAAATTCAGTACATAGCA
ATATCGCAGTCGGATGCTGACAGTGAATCTTGTAAGATGCCACAAACAGTTGAATGGTCC
AAATTAATTTCTGAAAACAAGAAGGTTATCATTACCGGTGCTCCAGCTGCTTTCTCCCA
ACCTGTA CTGTCAGCCATATTCCAGGTTACATCAACTACTTGGATGAATTAGTTAAGGAA
AAGGAAGTTGACCAAGTGATCGTTGTTACTGTTGACAACCCGTTTCGCTAACCAAGCGTGG
GCTAAGAGTTTAGGTGTTAAGGACACCACACACATCAAGTTTGCCTCCGACCCAGGCTGT
GCTTTCACCAAATCCATTGGTTTTCGAATTAGCCGTCGGTGACGGTGTACTGGAGTGGT
AGATGGGCCATGGTTGTTGAAAACGGTATCGTTACTTACGCTGCCAAGGAAACCAACCA
GGTACCGATGTGACCGTATCGTCGGTAGAGTCGGTACTTGCTCATTGTTAG
```

>double\_cluster2\_3\_YLR109W (used to calculate  $\tau_{2,ik}$ )

```
ATGTCTGACTTAGTTAACAAGAAATTCCCAGCTGGCGACTACAAATTCGAATACATTGCT
ATCAGCCAAAGTGATGCTGACAGTGAATCTTGTAAGATGCCACAAACAGTTGAATGGTCC
AAATTAATTTCTGAAAACAAGAAGGTTATCATTACCGGTGCTCCAGCTGCTTTCTCCCA
ACCTGTA CTGTCAGCCATATTCCAGGTTACATCAACTACTTGGATGAATTAGTTAAGGAA
AAGGAAGTTGACCAAGTGATCGTTGTTACTGTTGACAACCCGTTTCGCTAACCAAGCGTGG
GCTAAGAGTTTAGGTGTTAAGGACACCACACACATCAAGTTTGCCTCCGACCCAGGCTGT
GCTTTCACCAAATCCATTGGTTTTCGAATTAGCCGTCGGTGACGGTGTACTGGAGTGGT
AGATGGGCCATGGTAGTAGAGAATGGGATAGTAACGTACGCTGCCAAGGAAACCAACCA
GGTACCGATGTGACCGTATCGTCGGTAGAGTCGGTACTTGCTCATTGTTAG
```

>wildtype\_YLR109W (used to calculate  $\tau_0$ )

ATGTCTGACTTAGTTAACAAGAAATCCCAGCTGGCGACTACAAATCCAATACATTGCT  
ATCAGCCAAAGTGATGCTGACAGTGAATCTTGTAAGATGCCACAAACAGTTGAATGGTCC  
AAATTAATTTCTGAAAACAAGAAGGTTATCATTACCGGTGCTCCAGCTGCTTTCTCCCA  
ACCTGTACTGTCAGCCATATTCCAGGTTACATCAACTACTTGGATGAATTAGTTAAGGAA  
AAGGAAGTTGACCAAGTGATCGTTGTTACTGTTGACAACCCGTTGCTAACCAAGCGTGG  
GCTAAGAGTTTAGGTGTTAAGGACACCACACACATCAAGTTTGCCTCCGACCCAGGCTGT  
GCTTTCACCAAATCCATTGGTTTCGAATTAGCCGTCGGTGACGGTGTACTGGAGTGGT  
AGATGGGCCATGGTTGTTGAAAACGGTATCGTTACTTACGCTGCCAAGGAAACCAACCCA  
GGTACCGATGTGACCGTTTCCTCAGTCGAAAGTGTCTTGCTCATTGTAG

>single\_cluster2\_YLR109W (used to calculate  $\tau_{1,i}$ )

ATGTCTGACTTAGTTAACAAGAAATCCCAGCTGGCGACTACAAATCCAATACATTGCT  
ATCAGCCAAAGTGATGCTGACAGTGAATCTTGTAAGATGCCACAAACAGTTGAATGGTCC  
AAATTAATTTCTGAAAACAAGAAGGTTATCATTACCGGTGCTCCAGCTGCTTTCTCCCA  
ACCTGTACTGTCAGCCATATTCCAGGTTACATCAACTACTTGGATGAATTAGTTAAGGAA  
AAGGAAGTTGACCAAGTGATCGTTGTTACTGTTGACAACCCGTTGCTAACCAAGCGTGG  
GCTAAGAGTTTAGGTGTTAAGGACACCACACACATCAAGTTTGCCTCCGACCCAGGCTGT  
GCTTTCACCAAATCCATTGGTTTCGAATTAGCCGTCGGTGACGGTGTACTGGAGTGGT  
AGATGGGCCATGGTAGAGAAATGGGATAGTAACGTACGCTGCCAAGGAAACCAACCCA  
GGTACCGATGTGACCGTTTCCTCAGTCGAAAGTGTCTTGCTCATTGTAG

>single\_cluster3\_YLR109W (used to calculate  $\tau_0$ )

ATGTCTGACTTAGTTAACAAGAAATCCCAGCTGGCGACTACAAATCCAATACATTGCT  
ATCAGCCAAAGTGATGCTGACAGTGAATCTTGTAAGATGCCACAAACAGTTGAATGGTCC  
AAATTAATTTCTGAAAACAAGAAGGTTATCATTACCGGTGCTCCAGCTGCTTTCTCCCA  
ACCTGTACTGTCAGCCATATTCCAGGTTACATCAACTACTTGGATGAATTAGTTAAGGAA  
AAGGAAGTTGACCAAGTGATCGTTGTTACTGTTGACAACCCGTTGCTAACCAAGCGTGG  
GCTAAGAGTTTAGGTGTTAAGGACACCACACACATCAAGTTTGCCTCCGACCCAGGCTGT  
GCTTTCACCAAATCCATTGGTTTCGAATTAGCCGTCGGTGACGGTGTACTGGAGTGGT  
AGATGGGCCATGGTTGTTGAAAACGGTATCGTTACTTACGCTGCCAAGGAAACCAACCCA  
GGTACCGATGTGACCGTATCGTCGGTAGAGTCGGTACTTGCTCATTGTAG

>double\_cluster1\_3\_YPL061W (used to calculate  $\tau_2$ )

ATGACTAAGCTACACTTTGACTGCTGAACCAGTCAAGATAACGCTTCCAATGGGCTT  
ACGTACGAGCAACCAACCGGTCTATTCATTAACAACAAGTTTATGAAAGCTCAAGACGGT  
AAGACCTATCCCGTCGAAGATCCTTCCACTGAAAACACCGTTTGTGAGGTCTCTTCTGCC  
ACCACTGAAGATGTTGAATATGCTATCGAATGTGCCGACCGTGCTTCCACGACTGAA  
TGGGCTACCCAAGACCCAAGAGAAAAGAGGCCGTCTACTAAGTAAGTTGGCTGACGAATTG  
GAAAGCCAAATTGACTTGGTTTCTCCATTGAAGCTTTGGACAATGGTAAAACCTTTGGCC  
TTAGCCCGTGGGGATGTTACCATTGCAATCAACTGTCTAAGAGATGCTGCTGCCTATGCC  
GACAAAGTCAACGGTAGAACAATCAACACCGGTGACGGCTACATGAACTTCACCACCTTA  
GAGCCAATCGGTGTCTGTGGTCAAATTATTCCATGGAACCTTCCAATAATGATGTTGGCT  
TGGAAGATCGCCCCAGCATTGGCCATGGGTAACGTCTGTATCTTGAAACCCGCTGCTGT  
ACACCTTTAAATGCCCTATACTTTGCTTCTTTATGTAAGAAGGTTGGTATTCCAGCTGGT  
GTCGTCAACATCGTTCAGGTCCTGGTAGAACTGTTGGTGCTGCTTTGACCAACGACCCA  
AGAATCAGAAAGCTGGCTTTTACCGGTTCTACAGAAGTCGGTAAGAGTGTTGCTGTCGAC  
TCTTCTGAATCTAACTTGAAGAAAATCACTTTGGAAGTGGTAAAGTCCGCCCATTTG  
GTCTTTGACGATGCTAACATTAAGAAGACTTTACCAAATCTAGTAAACGGTATTTTCAAG  
AACGCTGGTCAAATTTGTTCTCTGGTTCTAGAATTTACGTTCAAGAAGGTATTTACGAC  
GAACTATTGGCTGCTTCAAGGCTTACTTGGAACCGAAATCAAAGTTGGTAATCCATTT  
GACAAGGCTAACTCCAAGGTGCTATCACTAACCGTCAACAATTCGACACAATTATGAAC  
TACATCGATATCGGTAAGAAAGAAGGCGCCAAGATCTTAACTGGTGGCGAAAAAGTTGGT  
GACAAGGGTTACTTCATCAGACCAACCGTTTTCTACGATGTTAATGAAGACATGAGAATT  
GTTAAGGAAGAAATTTTGGACCAGTTGTCACTGTCGAAAGTTCAAGACTTTAGAAGAA  
GGTGTCAAATGGCTAACAGCTCTGAATTCGGTCTAGGTTCTGGTATCGAAACAGAATCT  
TTGAGCACAGGTTTGAAGGTGGCCAAGATGTTGAAGGCCGGTACCGTCTGGATCAACACA  
TACAACGATTTTACTCCAGAGTTCCATTCGGTGGTGTAAAGCAATCTGGTTACGGTAGA  
GAAATGGGTGAAGAAGTCTACCATGCATACACGGAGGTAAGCAGTAAGGATAAAGTTG  
TAA

>double\_cluster2\_3\_YPL061W (used to calculate  $\tau_{2,ik}$ )

ATGACTAAGCTACACTTTGACTGCTGAACCAGTCAAGATCACACTTCCAATGGTTTG  
ACATACGAGCAACCAACCGGTCTATTCATTAACAACAAGTTTATGAAAGCTCAAGACGGT  
AAGACCTATCCCGTCGAAGATCCTTCCACTGAAAACACCGTTTGTGAGGTCTCTTCTGCC  
ACCACTGAAGATGTTGAATATGCTATCGAATGTGCCGACCGTGCTTCCACGACTGAA  
TGGGCTACCCAAGACCCAAGAGAAAAGAGGCCGTCTACTAAGTAAGTTGGCTGACGAATTG  
GAAAGCCAAATTGACTTGGTTTCTCCATTGAAGCTTTGGACAATGGTAAAACCTTTGGCC  
TTAGCCCGTGGGGATGTTACCATTGCAATCAACTGTCTAAGAGATGCTGCTGCCTATGCC  
GACAAAGTCAACGGTAGAACAATCAACACCGGTGACGGCTACATGAACTTCAACACCTTA  
GAGCCAATCGGTGTCTGTGGTCAAATTATTCCATGGAACCTTCCAATAATGATGTTGGCT  
TGGAAGATCGCCCCAGCATTGGCCATGGGTAACGTCTGTATCTTGAAACCCGCTGCTGTC  
ACACCTTTAAATGCCCTATACTTTGCTTCTTTATGTAAGAAGGTTGGTATTCCAGCTGGT  
GTCGTCAACATCGTTCAGGTCCTGGTAGAACTGTTGGTGCTGCTTTGACCAACGACCCA  
AGAATCAGAAAGCTGGCTTTTACCGTTCTACAGAAGTCGGTAAGAGTGTTGCTGTCGAC  
TCTTCTGAATCTAACTGAAGAAAATCACTTTGGAAGTGGTAAAGTCCGCCCATTTG  
GTCTTTGACGATGCTAACATTAAGAAGACTTTACCAAATCTAGTAAACGGTATTTTCAAG  
AACGCTGGTCAAATTTGTTCTCTGGTTCTAGAATTTACGTTCAAGAAGGTATTTACGAC  
GAACTATTGGCTGCTTCAAGGCTTACTTGGAACCGAAATCAAAGTTGGTAATCCATTT  
GACAAGGCTAACTCCAAGGTGCTATCACTAACCGTCAACAATTCGACACAATTATGAAC  
TACATCGATATCGGTAAGAAAGAAGGCGCCAAGATCTTAACTGGTGGCGAAAAAGTTGGT  
GACAAGGGTTACTTCATCAGACCAACCGTTTTCTACGATGTTAATGAAGACATGAGAATT  
GTTAAGGAAGAAATTTTGGACCAGTTGTCACTGTCGCAAAGTTCAAGACTTTAGAAGAA  
GGTGTCAAATGGTAACAGCTCTGAATTCGGTCTAGGTTCTGGTATCGAAACAGAATCT  
TTGAGCACAGGTTTGAAGGTGGCCAAGATGTTGAAGGCCGGTACCGTCTGGATCAACACA  
TACAACGATTTTACTCGAGGGTACCCTTCGGGGGGGTAAAGCAATCTGGTTACGGTAGA  
GAAATGGGTGAAGAAGTCTACCATGCATACACGGAGGTAAAAGCAGTAAGGATAAAGTTG  
TAA

>wildtype\_YPL061W (used to calculate  $\tau_0$ )

ATGACTAAGCTACACTTTGACTGCTGAACCAGTCAAGATCACACTTCCAATGGTTTG  
ACATACGAGCAACCAACCGGTCTATTCATTAACAACAAGTTTATGAAAGCTCAAGACGGT  
AAGACCTATCCCGTCGAAGATCCTTCCACTGAAAACACCGTTTGTGAGGTCTCTTCTGCC  
ACCACTGAAGATGTTGAATATGCTATCGAATGTGCCGACCGTGCTTCCACGACTGAA  
TGGGCTACCCAAGACCCAAGAGAAAAGAGGCCGTCTACTAAGTAAGTTGGCTGACGAATTG  
GAAAGCCAAATTGACTTGGTTTCTCCATTGAAGCTTTGGACAATGGTAAAACCTTTGGCC  
TTAGCCCGTGGGGATGTTACCATTGCAATCAACTGTCTAAGAGATGCTGCTGCCTATGCC  
GACAAAGTCAACGGTAGAACAATCAACACCGGTGACGGCTACATGAACTTCACCACCTTA  
GAGCCAATCGGTGTCTGTGGTCAAATTATTCCATGGAACCTTCCAATAATGATGTTGGCT  
TGGAAGATCGCCCCAGCATTGGCCATGGGTAACGTCTGTATCTTGAAACCCGCTGCTGT  
ACACCTTTAAATGCCCTATACTTTGCTTCTTTATGTAAGAAGGTTGGTATTCCAGCTGGT  
GTCGTCAACATCGTTCAGGTCCTGGTAGAACTGTTGGTGCTGCTTTGACCAACGACCCA  
AGAATCAGAAAGCTGGCTTTTACCGGTTCTACAGAAGTCGGTAAGAGTGTTGCTGTCGAC  
TCTTCTGAATCTAACTTGAAGAAAATCACTTTGGAAGTGGTAAGTCCGCCCATTTG  
GTCTTTGACGATGCTAACATTAAGAAGACTTTACCAAATCTAGTAAACGGTATTTTCAAG  
AACGCTGGTCAAATTTGTTCTCTGGTTCTAGAATTTACGTTCAAGAAGGTATTTACGAC  
GAACTATTGGCTGCTTCAAGGCTTACTTGGAACCGAAATCAAAGTTGGTAATCCATTT  
GACAAGGCTAACTCCAAGGTGCTATCACTAACCGTCAACAATTGACACAATTATGAAC  
TACATCGATATCGGTAAGAAAGAAGGCGCCAAGATCTTAACTGGTGGCGAAAAAGTTGGT  
GACAAGGGTTACTTCATCAGACCAACCGTTTTCTACGATGTTAATGAAGACATGAGAATT  
GTTAAGGAAGAAATTTTGGACCAGTTGTCACTGTCGAAAGTTCAAGACTTTAGAAGAA  
GGTGTCAAATGGCTAACAGCTCTGAATTCGGTCTAGGTTCTGGTATCGAAACAGAATCT  
TTGAGCACAGGTTTGAAGGTGGCCAAGATGTTGAAGGCCGGTACCGTCTGGATCAACACA  
TACAACGATTTTACTCCAGAGTTCCATTCGGTGGTGAAGCAATCTGGTTACGGTAGA  
GAAATGGGTGAAGAAGTCTACCATGCATACACTGAAGTAAAAGCTGTCAGAATTAAGTTG  
TAA

>single\_cluster2\_YPL061W (used to calculate  $\tau_{1,i}$ )

ATGACTAAGCTACACTTTGACTGCTGAACCAGTCAAGATCACACTTCCAATGGTTG  
ACATACGAGCAACCAACCGGTCTATTCATTAACAACAAGTTTATGAAAGCTCAAGACGGT  
AAGACCTATCCCGTCGAAGATCCTTCCACTGAAAACACCGTTTGTGAGGTCTCTTCTGCC  
ACCACTGAAGATGTTGAATATGCTATCGAATGTGCCGACCGTGCTTCCACGACTGAA  
TGGGCTACCCAAGACCCAAGAGAAAAGAGGCCGCTACTAAGTAAGTTGGCTGACGAATTG  
GAAAGCCAAATTGACTTGGTTTCTCCATTGAAGCTTTGGACAATGGTAAAACCTTTGGCC  
TTAGCCCGTGGGGATGTTACCATTGCAATCAACTGTCTAAGAGATGCTGCTGCCTATGCC  
GACAAAGTCAACGGTAGAACAATCAACACCGGTGACGGCTACATGAACTTCAACACCTTA  
GAGCCAATCGGTGTCTGTGGTCAAATTATTCCATGGAACCTTCCAATAATGATGTTGGCT  
TGGAAGATCGCCCCAGCATTGGCCATGGGTAACGTCTGTATCTTGAAACCCGCTGCTGTC  
ACACCTTTAAATGCCCTATACTTTGCTTCTTTATGTAAGAAGGTTGGTATTCCAGCTGGT  
GTCGTCAACATCGTTCAGGTCCCTGGTAGAACTGTTGGTGCTGCTTTGACCAACGACCCA  
AGAATCAGAAAGCTGGCTTTTACCGTTCTACAGAAGTCGGTAAGAGTGTTGCTGTCGAC  
TCTTCTGAATCTAACTGAAGAAAATCACTTTGGAAGTGGTGGTAAGTCCGCCCATTTG  
GTCTTTGACGATGCTAACATTAAGAAGACTTTACCAAATCTAGTAAACGGTATTTTCAAG  
AACGCTGGTCAAATTTGTTCTCTGGTTCTAGAATTTACGTTCAAGAAGGTATTTACGAC  
GAACTATTGGCTGCTTCAAGGCTTACTTGGAACCGAAATCAAAGTTGGTAATCCATTT  
GACAAGGCTAACTCCAAGGTGCTATCACTAACCGTCAACAATTCGACACAATTATGAAC  
TACATCGATATCGGTAAGAAAGAAGGCGCCAAGATCTTAACTGGTGGCGAAAAAGTTGGT  
GACAAGGGTTACTTCATCAGACCAACCGTTTTCTACGATGTTAATGAAGACATGAGAATT  
GTTAAGGAAGAAATTTTGGACCAGTTGTCACTGTCGAAAGTTCAAGACTTTAGAAGAA  
GGTGTCAAATGGTAACAGCTCTGAATTCGGTCTAGGTTCTGGTATCGAAACAGAATCT  
TTGAGCACAGGTTTGAAGGTGGCCAAGATGTTGAAGGCCGGTACCGTCTGGATCAACACA  
TACAACGATTTTACTCGAGGGTACCCTTCGGGGGGGTAAAGCAATCTGGTTACGGTAGA  
GAAATGGGTGAAGAAGTCTACCATGCATACACTGAAGTAAAAGCTGTCAGAATTAAGTTG  
TAA



>single\_cluster3\_YPL061W (used to calculate  $\tau_1$ )

ATGACTAAGCTACACTTTGACTGCTGAACCAAGTCAAGATCACACTTCCAATGGTTTG  
ACATACGAGCAACCAACCGGTCTATTCATTAACAACAAGTTTATGAAAGCTCAAGACGGT  
AAGACCTATCCCGTCGAAGATCCTTCCACTGAAAACACCGTTTGTGAGGTCTCTTCTGCC  
ACCACTGAAGATGTTGAATATGCTATCGAATGTGCCGACCGTGCTTCCACGACTGAA  
TGGGCTACCCAAGACCAAGAGAAAAGAGGCCGTCTACTAAGTAAGTTGGCTGACGAATTG  
GAAAGCCAAATTGACTTGGTTTCTCCATTGAAGCTTTGGACAATGGTAAAACCTTGGCC  
TTAGCCCGTGGGGATGTTACCATTGCAATCAACTGTCTAAGAGATGCTGCTGCCTATGCC  
GACAAAGTCAACGGTAGAACAATCAACACCGGTGACGGCTACATGAACTTCAACACCTTA  
GAGCCAATCGGTGTCTGTGGTCAAATTATTCCATGGAACCTTCCAATAATGATGTTGGCT  
TGGAAGATCGCCCCAGCATTGGCCATGGGTAACGTCTGTATCTTGAAACCCGCTGCTGTC  
ACACCTTAAATGCCCTATACTTTGCTTCTTTATGTAAGAAGGTTGGTATTCCAGCTGGT  
GTCGTCAACATCGTTCCAGGTCCTGGTAGAACTGTTGGTGCTGCTTTGACCAACGACCCA  
AGAATCAGAAAGCTGGCTTTTACCGTTTACAGAAGTCGGTAAGAGTGTTGCTGTGCGAC  
TCTTCTGAATCTAACTGAAGAAAATCACTTTGAACTAGGTGGTAAGTCCGCCCATTTG  
GTCTTTGACGATGCTAACATTAAGAAGACTTTACCAAATCTAGTAAACGGTATTTTCAAG  
AACGCTGGTCAAATTTGTTCTCTGGTTCTAGAATTTACGTTCAAGAAGGTATTTACGAC  
GAACTATTGGCTGCTTCAAGGCTTACTTGAAACCGAAATCAAAGTTGGTAATCCATTT  
GACAAGGCTAACTCCAAGGTGCTATCACTAACCGTCAACAATTCGACACAATTATGAAC  
TACATCGATATCGGTAAGAAAGAAGGCCCAAGATCTTAACTGGTGGCGAAAAAGTTGGT  
GACAAGGGTTACTTCATCAGACCAACCGTTTTCTACGATGTTAATGAAGACATGAGAATT  
GTTAAGGAAGAAATTTTGGACCAGTTGTCACTGTCGAAAGTTCAAGACTTTAGAAGAA  
GGTGTGCAAATGGCTAACAGCTCTGAATTCGGTCTAGGTTCTGGTATCGAAACAGAATCT  
TTGAGCACAGGTTTGAAGGTGGCCAAGATGTTGAAGGCCGGTACCGTCTGGATCAACACA  
TACAACGATTTTACTCCAGAGTTCCATTCGGTGGTGTGAAGCAATCTGGTTACGGTAGA  
GAAATGGGTGAAGAAGTCTACCATGCATACACGGAGGTAAGCAAGTAAGGATAAAGTTG  
TAA
